# Supplementary material for: Green synthesis and evaluation of an iron-based metal–organic framework MIL-88B for efficient decontamination of arsenate from water
Source: Royal Society of Chemistry journal article supplement (doi:10.1039/c7dt03775a), 2018-01-01
Supplement: c7dt03775a1.pdf [file c7dt03775a1.pdf]

## Supporting Information

### **Green synthesis and evaluation of iron-based metal–organic framework MIL-88B for the efficient decontamination of arsenate from water**

*Shuliang Hou,<sup>a</sup> Yi-nan Wu,<sup>\* a</sup> Lingyu Feng,<sup>a</sup> Wei Chen,<sup>a</sup> Ying Wang,<sup>a</sup>*

*Catherine Morlay,<sup>\* b</sup> and Fengting Li<sup>a</sup>*

<sup>a</sup> College of Environmental Science and Engineering, State Key Laboratory of Pollution Control and Resource Reuse, Shanghai Key Lab of Chemical Assessment and Sustainability, Department of Chemistry, Tongji University, Siping Rd 1239, 200092 Shanghai, China.

<sup>b</sup> Univ Lyon, Univ Lyon 1, INSA-Lyon, CNRS, MATEIS (UMR 5510), F-69621, Lyon, France.

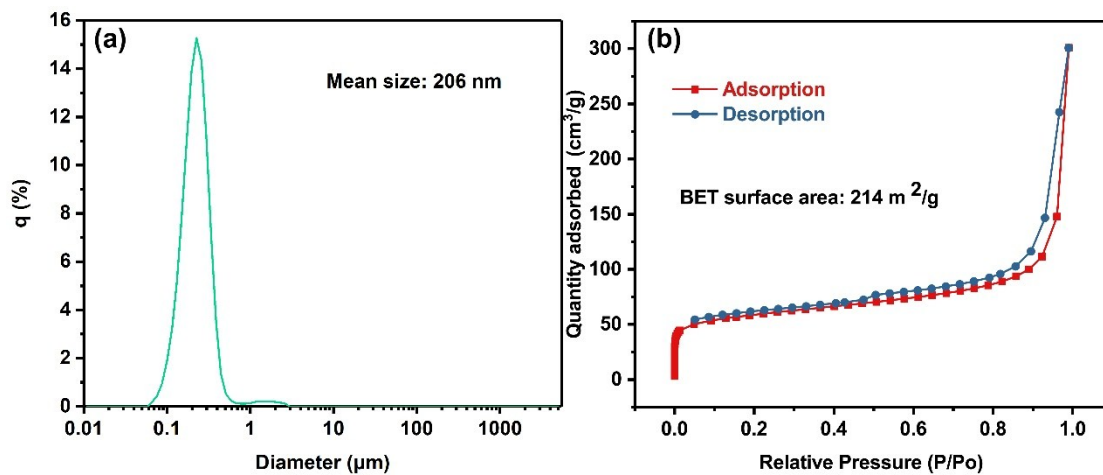

**Figure S1.** Size distribution in EtOH (a) and  $\text{N}_2$  adsorption-desorption isotherm (b) of the prepared MIL-88B(Fe)-E

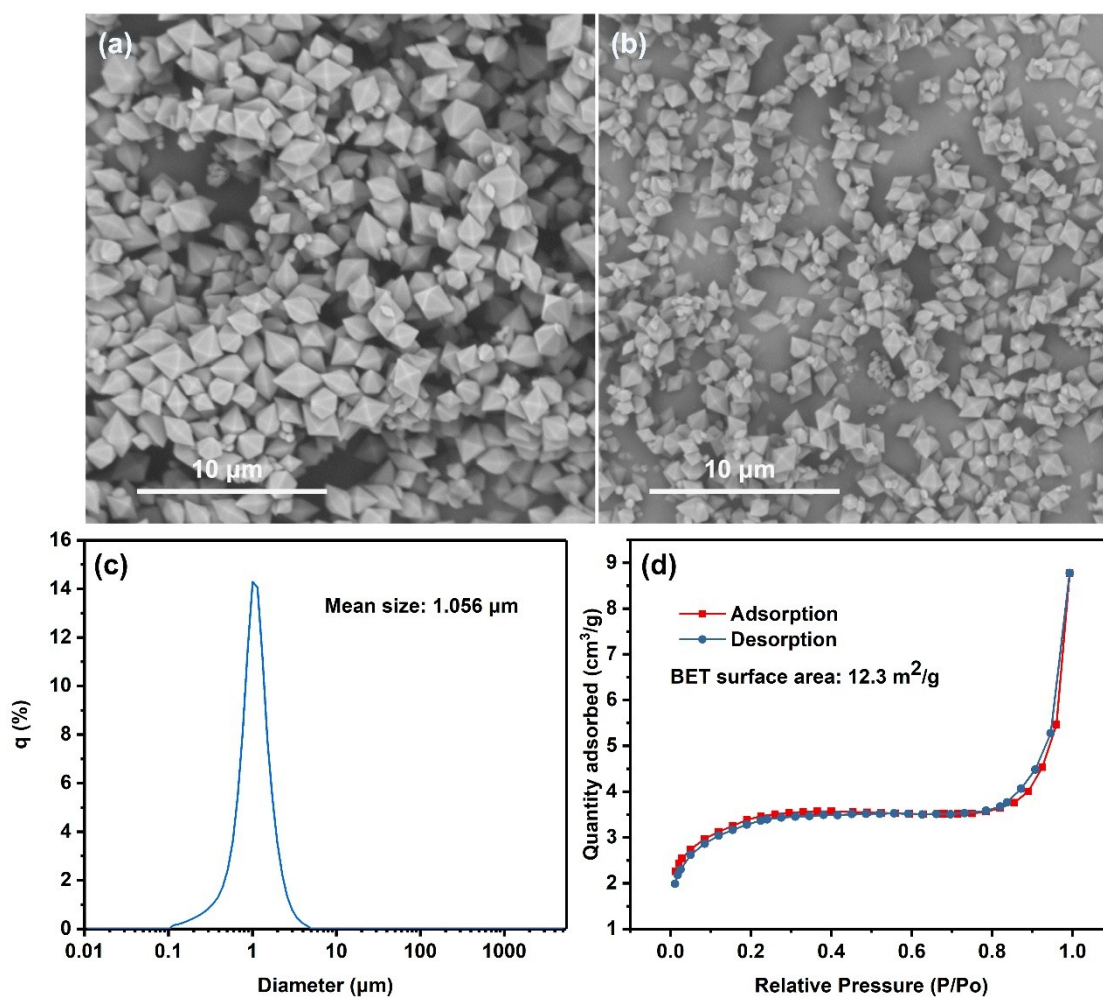

**Figure S2.** SEM images (a) and (b), the size distribution (c) and  $\text{N}_2$  adsorption-desorption isotherm of MIL-88B(Fe)-D synthesized by conventional method.

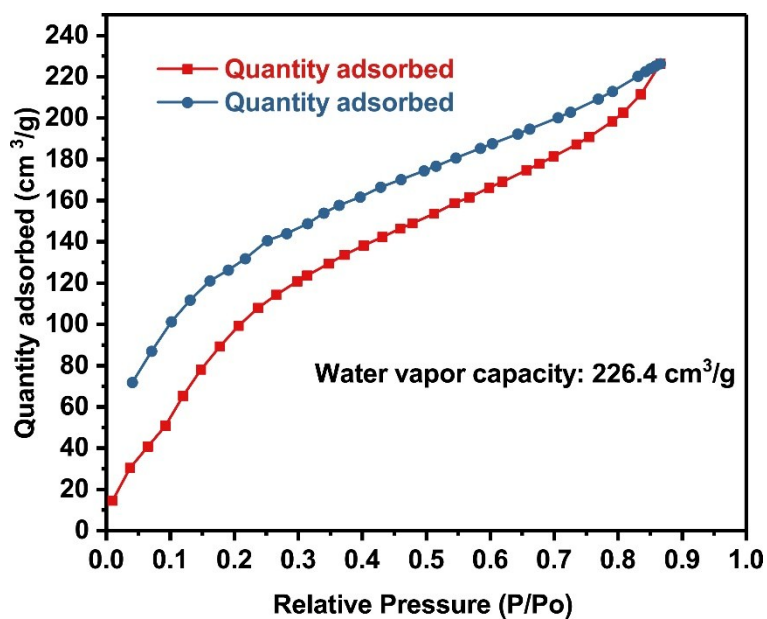

**Figure S3.** Water vapor adsorption isotherms of the MIL-88B(Fe)-E at 298 K.

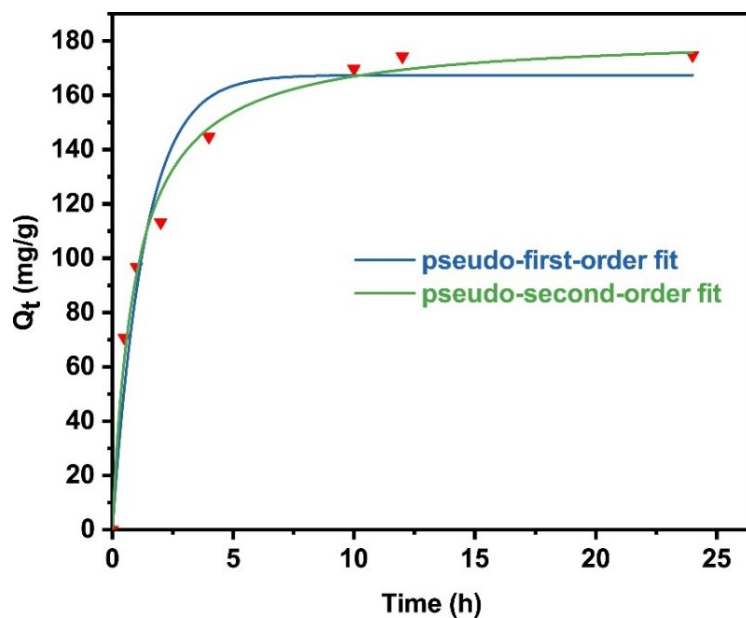

**Figure S4.** Adsorption kinetics of As(V) on MIL-88B(Fe)-E fitted with the pseudo-first-order and pseudo-second-order model.

**Table S1.** Adsorption kinetics parameters of As(V) onto MIL-88B(Fe)-E.

| Adsorbent     | Pseudo first order |        |       | Pseudo second order |        |       |
|---------------|--------------------|--------|-------|---------------------|--------|-------|
|               | $k_1$              | $q_e$  | $R^2$ | $k_2$               | $q_e$  | $R^2$ |
| MIL-88B(Fe)-E | 0.750              | 167.46 | 0.962 | 0.006               | 182.72 | 0.992 |

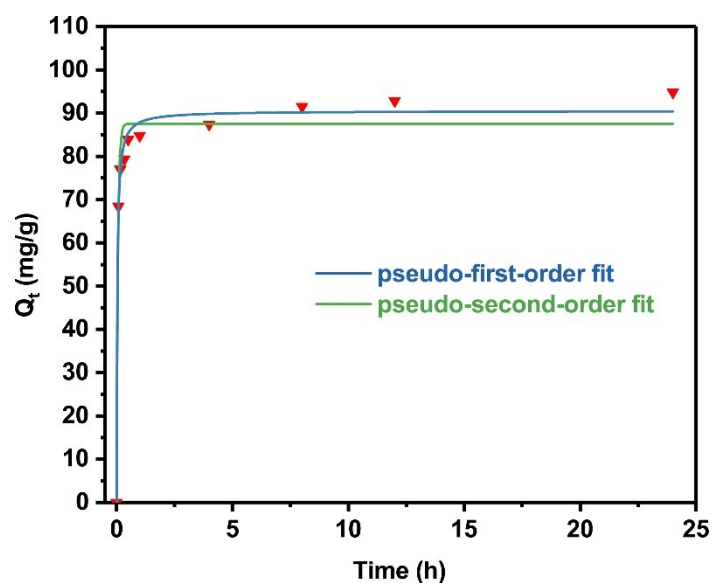

**Figure S5.** Adsorption kinetics of As(V) on MIL-88B(Fe)-D fitted with the pseudo-first-order and pseudo-second-order model.

**Table S2.** Adsorption kinetics parameters of As(V) onto MIL-88B(Fe)-D.

| Adsorbent     | Pseudo first order |       |       | Pseudo second order |       |       |
|---------------|--------------------|-------|-------|---------------------|-------|-------|
|               | $k_1$              | $q_e$ | $R^2$ | $k_2$               | $q_e$ | $R^2$ |
| MIL-88B(Fe)-E | 16.54              | 87.51 | 0.969 | 0.366               | 90.50 | 0.991 |

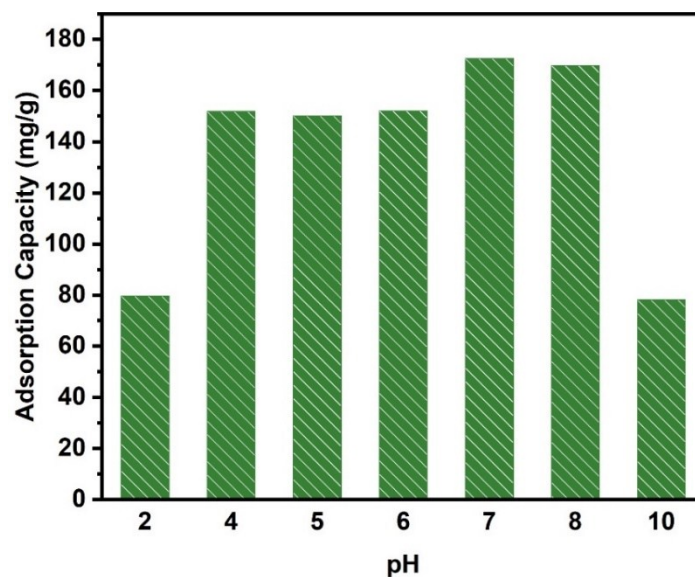

**Figure S6.** the pH influence on adsorption behavior of As(V) on MIL-88B(Fe)-E.

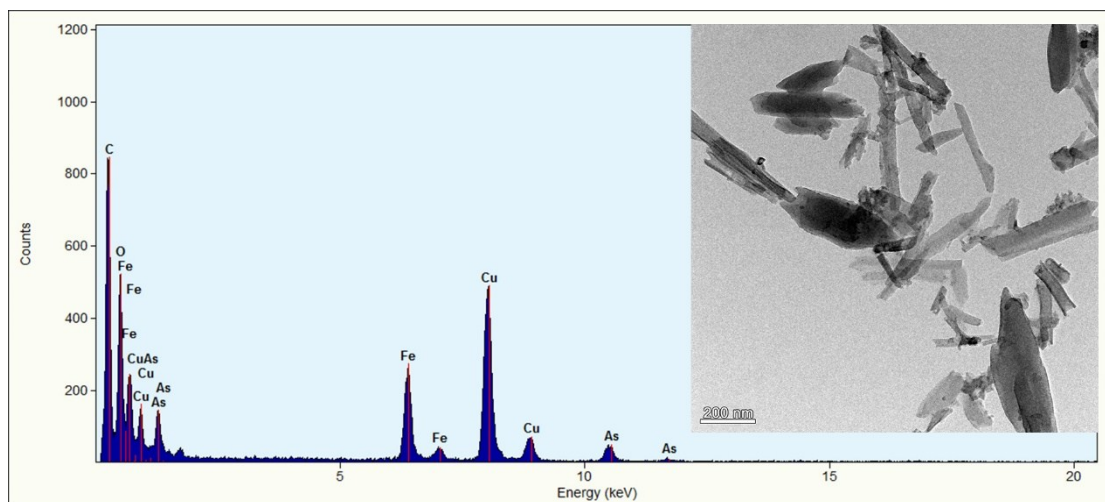

**Figure S7.** TEM image and corresponding EDS spectra of MIL-88B(Fe)-E after the adsorption of As(V).

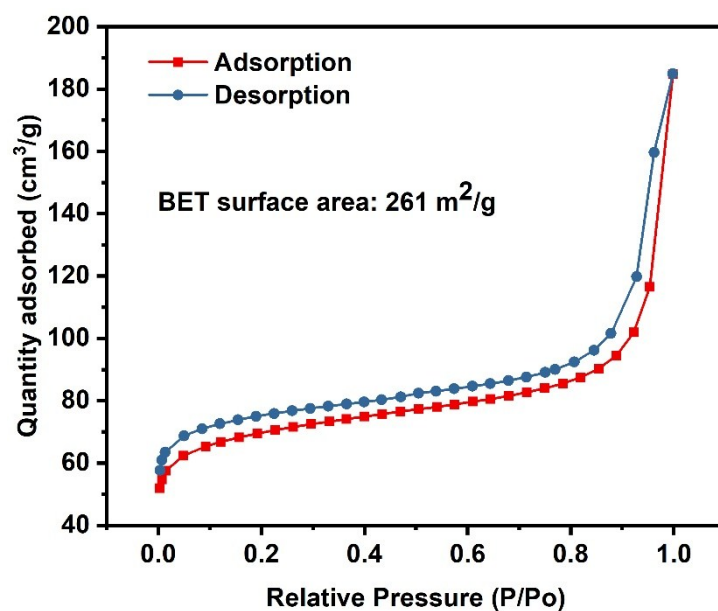

**Figure S8.** N<sub>2</sub> adsorption-desorption isotherm of MIL-88B(Fe)-E synthesized from 1 L autoclave at room temperature.
